# Supplementary material for: Application of Ultra-High-Performance Liquid Chromatography Coupled with LTQ-Orbitrap Mass Spectrometry for the Qualitative and Quantitative Analysis of Polygonum multiflorum Thumb. and Its Processed Products
Source: MDPI journal article supplement (doi:10.3390/molecules21010040), 2015-12-26
Supplement: s1 [file s1]

# Supporting Information: Application of Ultra-High-Performance Liquid Chromatography Coupled with LTQ-Orbitrap Mass Spectrometry for the Qualitative and Quantitative Analysis of *Polygonum multiflorum* Thumb. and Its Processed Products

Teng-Hua Wang, Jing Zhang, Xiao-Hui Qiu, Jun-Qi Bai, You-Heng Gao and Wen Xu

**Table S1.** Crude drug and its processed products collected in the present study.

| Sample No. | Processing Methods       | Origins                            | Batch No.    |
|------------|--------------------------|------------------------------------|--------------|
| A1         | Crude                    | Deqing County, Guangdong Province  | 20090527     |
| A2         | Crude                    | Guiming County                     | Y91619       |
| A3         | Crude                    | Deqing County, Guangdong Province  | 080817       |
| A4         | Crude                    | Gaozhou County, Guangdong Province | 20080801     |
| A5         | Crude                    | Sichuan Province                   | Y090618      |
| A6         | Crude                    | Sichuan Province                   | Y090624      |
| A7         | Crude                    | Gaozhou County, Guangdong Province | 20080801     |
| A8         | Crude                    | Deqing County, Guangdong Province  | 090817       |
| A9         | Crude                    | Sichuan Province                   | Y090620      |
| A10        | Crude                    | Sichuan Province                   | Y090621      |
| B1         | Black soybean processing | Gaozhou County, Guangdong Province | 2008080124ht |
| B2         | Black soybean processing | Gaozhou County, Guangdong Province | 200808012ht  |
| B3         | Black soybean processing | Gaozhou County, Guangdong Province | 2008080124hh |
| B4         | Black soybean processing | Gaozhou County, Guangdong Province | 200808012hh  |
| B5         | Black soybean processing | Deqing County, Guangdong Province  | 20080817h    |
| C1         | Steaming processing      | Guangdong Province                 | 100900531    |
| C2         | Steaming processing      | Sichuan Province                   | 090723       |
| C3         | Steaming processing      | Guizhou Province                   | 090720       |
| C4         | Steaming processing      | Sichuan Province                   | 090722       |
| C5         | Steaming processing      | Guangdong Province                 | 090721       |
